1 Associations between Afrotropical bats, parasites, and microbial symbionts

2

3 Lutz, Holly L.<sup>1,2</sup> \*, Jackson, Elliot W.<sup>3</sup>, Dick, Carl W.<sup>2,4</sup>, Webala, Paul W.<sup>5</sup>, Babyesiza,

4 Waswa S.<sup>6</sup>, Kerbis Peterhans, Julian C.<sup>2,7</sup>, Demos, Terrence C.<sup>2</sup>, Patterson, Bruce D.<sup>2</sup>,

5 Gilbert, Jack A.<sup>1,8</sup> \*

6

7 <sup>1</sup> Department of Surgery, University of Chicago, Chicago, Illinois, USA.

8 <sup>2</sup> Integrative Research Center, Field Museum of Natural History, Chicago, Illinois, USA

9 <sup>3</sup> Department of Microbiology, Cornell University, Ithaca, New York, USA

10 <sup>4</sup> Department of Biology, Western Kentucky University, Bowling Green, Kentucky, USA

11 <sup>5</sup> Department of Forestry and Wildlife Management, Maasai Mara University, Narok,

12 Kenya

13 <sup>6</sup> Department of Wildlife Management, Sokoine University of Agriculture, Morogoro,

14 Tanzania

15 <sup>7</sup> Department of Biological Sciences, Roosevelt University, Chicago, Illinois, USA

16 <sup>8</sup> Biosciences Division, Argonne National Laboratory, Argonne, Illinois, USA

17

18 Corresponding author:

19 Holly L. Lutz & Jack A. Gilbert

20 Department of Surgery

21 Division of the Biological Sciences

22 University of Chicago

23 5851 S. Maryland Avenue

24 Chicago, IL 60637 - 1508

25 hlutz@surgery.bsd.uchicago.edu

26 gilbertjack@uchicago.edu

27

28

29 ABSTRACT

30

31 Bats are among the most diverse animals on the planet and harbor numerous bacterial,  
32 viral, and eukaryotic symbionts. The interplay between bacterial community composition  
33 and parasitism in bats is not well understood and may have important implications for  
34 studies of similar systems. Here we present a comprehensive survey of dipteran and  
35 haemosporidian parasites, and characterize the gut, oral, and skin microbiota of  
36 Afrotropical bats. We identify significant correlations between bacterial community  
37 composition of the skin and dipteran ectoparasite prevalence across four major bat  
38 lineages, as well as links between the oral microbiome and malarial parasitism, suggesting  
39 a potential mechanism for host selection and vector-borne disease transmission in bats. In  
40 contrast to recent studies of host-microbe phylosymbiosis in mammals, we find no  
41 correlation between chiropteran phylogenetic distances and bacterial community  
42 dissimilarity across the three anatomical sites, suggesting that host environment is more  
43 important than shared ancestry in shaping the composition of bat-associated bacterial  
44 communities.

45

46

47 Keywords: microbiome, malaria, vector-borne disease, Afrotropics, Chiroptera

48 SIGNIFICANCE

49

50 Animals rely on bacterial symbionts for numerous biological functions, such as digestion  
51 and immune system development. Increasing evidence suggests that host-associated  
52 microbes may play a role in mediating parasite burden. This study is the first to provide a  
53 comprehensive survey of bacterial symbionts from multiple anatomical sites across a  
54 broad taxonomic range of Afrotropical bats, demonstrating significant associations  
55 between the bat microbiome and parasite prevalence. This study provides a framework for  
56 future approaches to systems biology of host-symbiont interactions across broad  
57 taxonomic scales, emphasizing the interdependence between microbial symbionts and  
58 vertebrate health in the study of wild organisms and their natural history.

59

60

61

62

63

64

65

66

67

68

69

70

## 71 INTRODUCTION

72

73       Humans and other animals rely on bacterial symbionts for numerous biological  
74 functions, such as digestion and immune system development (1, 2). Many studies have  
75 found significant associations between host phylogeny (shared common ancestry) and  
76 bacterial community composition (3, 4), while others have identified dietary or  
77 spatiotemporal variables as significant drivers of host-microbe associations over the course  
78 of an individual lifespan (5-7). The influence of microbes on their hosts may be context  
79 dependent, such that the presence of a particular microbe may be beneficial under one set  
80 of ecological conditions and harmful under another. Thus, patterns of association  
81 between animals and bacterial symbionts provide a unique lens through which to explore  
82 evolutionary and ecological phenomena.

83       Recognition of the interdependence between microbial symbionts and animal  
84 health has led to a growing paradigm shift in the study of wild organisms and their  
85 natural history. In addition to exhibiting variation in life history characteristics, animals  
86 serve as hosts to myriad bacteria, archaea, viruses, fungi, and eukaryotic organisms. Many  
87 relationships between eukaryotic parasites and hosts have ancient origins, and the same  
88 may be true for host-microbial associations. It is possible that bacterial symbionts of  
89 vertebrate hosts interact with eukaryotic parasites, viruses, or fungal symbionts in ways  
90 that could shape host evolution (8). For example, evidence from human and  
91 anthropophilic mosquito interactions suggests that the skin microbiome can influence  
92 vector feeding preference, thereby affecting transmission patterns of mosquito-borne



93 pathogens (such as West Nile virus, yellow fever, dengue, malaria, etc.), and ultimately  
94 imposing selective pressures on human populations - indeed, positive selection of  
95 malaria-protective genes can be seen in the human genome (9). Despite the potential  
96 significance of such interactions between hosts, microbes, and pathogen-transmitting  
97 vectors, they have not been well studied in most wild vertebrate systems.

98         Bats (Mammalia: Chiroptera) are an important system for comparison of the  
99 relative contributions of evolutionary and ecological factors driving host-symbiont  
100 associations. In addition to being one of the most speciose orders of mammals (second  
101 only to the order Rodentia), bats frequently live in large colonies, are long-lived, and  
102 volant, granting them access to a wide geographic range relative to their non-volant  
103 mammalian counterparts. The associations of diverse eukaryotic parasites (*e.g.* dipteran  
104 insects, haemosporidia, helminths) within numerous bat lineages have been well-  
105 characterized (10-13). Furthermore, bats have received increasing attention due to their  
106 role as reservoirs of human pathogens (*e.g.* Ebola, Marburg, Nipah, SARS (14-18)).  
107 Taken together, these features make bats an important and tractable model for studying  
108 the interaction of bacterial symbionts and non-bacterial parasites and pathogens.

109         In this study, we conduct the first broad-scale study of Afrotropical bat-associated  
110 microbes. We test associations between bacterial community composition in the  
111 gastrointestinal tract, skin, and oral cavities from nine families and nineteen genera of  
112 bats. We pair this information with host-parasite associations between bats and  
113 ectoparasites in the superfamily Hippoboscoidea (obligate hematophagous dipteran  
114 insects), and haemosporidian (malarial) parasites putatively vectored by these  
115 hippoboscoid insects. Using a combination of machine learning, network theory, and

116 negative binomial distribution models, we test the hypothesis that host-associated  
117 bacterial communities predict prevalence of parasitism by obligate dipteran and malarial  
118 parasites.

119

## 120 RESULTS

121

### 122 1) Ectoparasite and malarial parasite prevalence among Afrotropical bats

123

124         Sampling was conducted across 20 sites in Kenya and Uganda from July-August  
125 of 2016. Sites ranged from sea level to ~2500m in elevation (Fig. 1; Table S1). We  
126 collected gut, oral, and skin samples for bacterial community characterization from a total  
127 of 494 individual bats, comprising 9 families, 19 genera, and 28 recognized species. Bat  
128 families with the greatest representation included Hipposideridae ( $n = 80$ ), Miniopteridae  
129 ( $n = 116$ ), Rhinolophidae ( $n = 88$ ), and Pteropodidae ( $n = 106$ ). All host and parasite  
130 vouchers are accessioned at the Field Museum of Natural History (Chicago, IL, USA)  
131 (Table S2). Miniopterid bats experienced the highest prevalence of both ectoparasitism  
132 (*M. minor*, 89%) and malarial parasitism (*M. minor*, 67%) (Table 1). Bats with similarly  
133 high ectoparasite prevalence at the host species level included *Rhinolophus eloquens* (79%  
134 prevalence), *Stenonycteris lanosus* (62%), and *Triaenops afer* (60%). Unlike miniopterid  
135 bats, these bat species did not harbor any detectable malarial parasites (Table 1).

136

137

138

139 Table 1. Bat sampling, ectoparasite prevalence ( $n_{\text{ecto}}$ ), and malarial parasite prevalence ( $n_{\text{haem}}$ ) and  
 140 identification.  
 141

| Bat family       | Bat species                      | $n_{\text{bats}}$ | $n_{\text{ecto}}$ (%) | $n_{\text{haem}}$ (%) |
|------------------|----------------------------------|-------------------|-----------------------|-----------------------|
| Emballonuridae   | <i>Coleura afra</i>              | 11                | 2 (18)                | 0                     |
| Hipposideridae   | <i>Hipposideros caffer</i>       | 47                | 18 (38)               | 0                     |
|                  | <i>Hipposideros camerunensis</i> | 1                 | 0                     | 0                     |
|                  | <i>Hipposideros ruber</i>        | 21                | 16 (76)               | 0                     |
|                  | <i>Macronycteris vittatus</i>    | 10                | 0                     | 0                     |
| Miniopteridae    | <i>Miniopterus africanus</i>     | 22                | 13 (59)               | 11 (50)               |
|                  | <i>Miniopterus natalensis</i>    | 54                | 16 (30)               | 13 (24)               |
|                  | <i>Miniopterus rufus</i>         | 22                | 20 (61)               | 20 (91)               |
|                  | <i>Miniopterus minor</i>         | 18                | 16 (89)               | 12 (67)               |
| Molossidae       | <i>Chaerephon bivittatus</i>     | 14                | 0                     | 0                     |
|                  | <i>Otomops harrisoni</i>         | 33                | 1 (3)                 | 0                     |
| Nycteridae       | <i>Nycteris arge</i>             | 3                 | 0                     | 0                     |
|                  | <i>Nycteris thebaica</i>         | 7                 | 1 (14)                | 0                     |
|                  | <i>Nycteris</i> sp.              | 6                 | 0                     | 0                     |
| Pteropodidae     | <i>Epomophorus labiatus</i>      | 2                 | 0                     | 0                     |
|                  | <i>Epomophorus wahlbergi</i>     | 11                | 0                     | 3 (27)                |
|                  | <i>Micropteropus pusillus</i>    | 4                 | 0                     | 0                     |
|                  | <i>Myonycteris angolensis</i>    | 5                 | 0                     | 0                     |
|                  | <i>Rousettus aegyptiacus</i>     | 47                | 24 (50)               | 0                     |
|                  | <i>Stenonycteris lanosus</i>     | 37                | 23 (62)               | 0                     |
| Rhinolophidae    | <i>Rhinolophus clivosus</i>      | 43                | 8 (19)                | 0                     |
|                  | <i>Rhinolophus eloquens</i>      | 24                | 19 (79)               | 0                     |
|                  | <i>Rhinolophus hildebrandti</i>  | 4                 | 1 (25)                | 0                     |
|                  | <i>Rhinolophus landeri</i>       | 14                | 0                     | 3 (21)                |
|                  | <i>Rhinolophus</i> sp.           | 3                 | 0                     |                       |
| Rhinonycteridae  | <i>Triaenops afer</i>            | 10                | 6 (60)                | 0                     |
| Vespertilionidae | <i>Myotis tricolor</i>           | 9                 | 8 (89)                | 3 (33)                |
|                  | <i>Neoromicia nana</i>           | 1                 | 0                     | 0                     |
|                  | <i>Neoromicia</i> sp.            | 3                 | 0                     |                       |
|                  | <i>Pipistrellus</i> sp.          | 2                 | 0                     | 0                     |
|                  | <i>Scotoecus hindei</i>          | 3                 | 1 (25)                | 0                     |
|                  | <i>Scotophilus dinganii</i>      | 3                 | 0                     | 0                     |
| Total            |                                  | 494               | 193                   | 65                    |

142  
 143

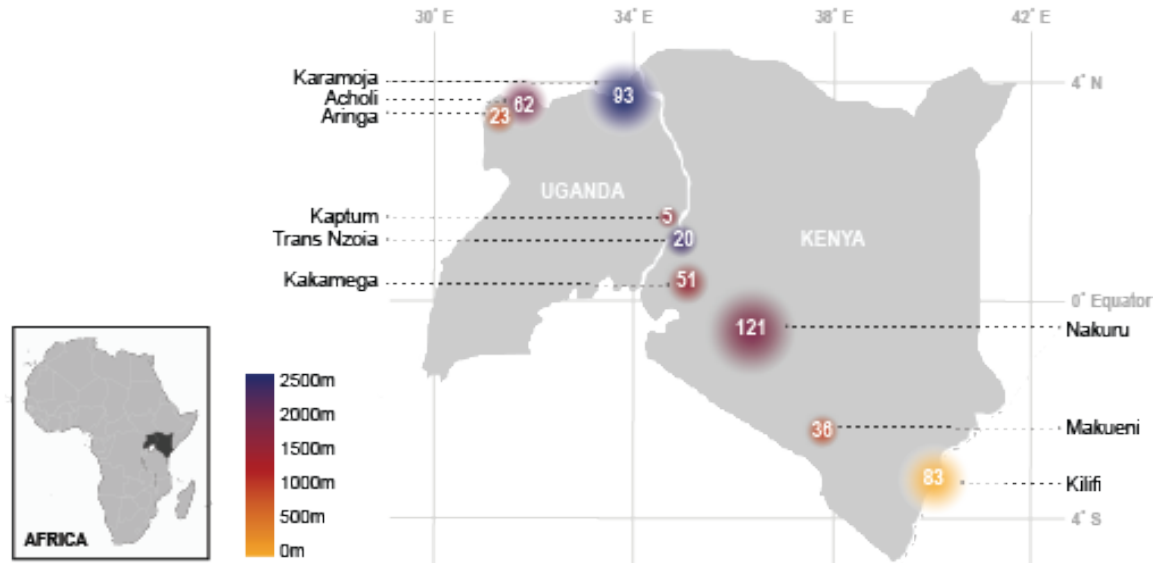

144

145 Figure 1. Sampling localities and elevation, grouped by county (see Table S1 for full  
146 locality information). Colors correspond to elevation, and white numbers and size of  
147 points correspond to number of bats collected.

148

149 2) Microbial richness associated with bat skin is significantly greater than gut or oral  
150 microbial communities

151

152 Sequencing produced a total of 1,236 libraries, with an average read depth of  
153 32,950 reads per library ( $\pm 19,850$  reads). Analyses and statistical tests were performed on  
154 non-rarefied data (libraries containing  $>1000$  reads and transformed to library read depth)  
155 and on rarefied data (libraries rarefied to a read depth of 10,000 sequences and  
156 subsequently transformed). The difference in library normalization methods only resulted  
157 in a decrease of total ASVs which did not affect the significance of alpha and beta-  
158 diversity statistical tests. Therefore, the results reported hereafter are from the non-

159 rarefied data set. Across all samples, 31,172 amplicon sequence variants (ASVs) were  
160 identified using Deblur (19) (for rarefied data set, 1,267 ASVs were dropped, resulting in  
161 a total of 29,890 ASVs identified across all samples). Total number of libraries per  
162 anatomical site, following filtering, included 396 libraries for gut, 374 libraries for oral,  
163 and 458 libraries for skin microbiomes (Table 2). Gut microbial communities exhibited  
164 the lowest overall diversity (8,204 ASVs), followed by oral (11,632 ASVs), and skin  
165 (29,149 ASVs), the latter being significantly greater than gut or oral ( $p < 2.2e-16$ ,  
166 Kruskal-Wallis; Bonferroni corrected  $p$ -value  $p < 1e-113$ , Dunn's test) (Fig. 2; Fig S1).  
167 The mean observed ASVs by anatomical site were 69, 96, and 587 for gut, oral, and skin  
168 samples, respectively (Table 2). Shannon index score of skin microbial communities were  
169 also significantly greater than gut or oral microbial communities ( $p < 2.2e-16$ , Kruskal-  
170 Wallis; Bonferroni corrected  $p$ -value  $p < 1e-119$ , Dunn's Test) (Fig. 2; Fig. S1).

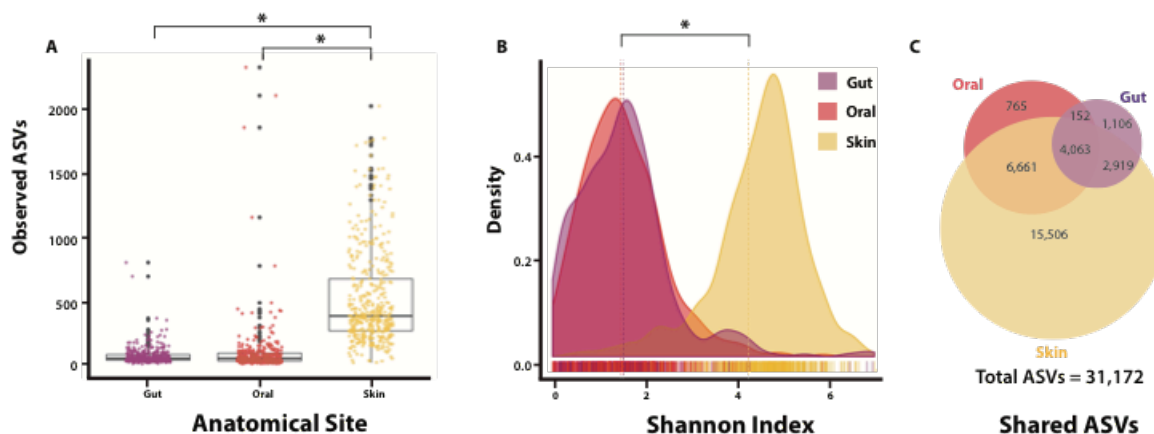

171  
172

173 Figure 2. Alpha diversity of amplicon sequence variants (ASVs) by anatomical sites,  
174 including (A) Observed richness, (B) Shannon index of diversity, (C) ASVs shared  
175 between anatomical sites. Asterisks indicate significant differences between groups  
176 (Dunn's Test, Bonferroni corrected  $p$ -value  $p < 0.0001$ ).

177 Table 2. Alpha diversity of microbial communities across anatomical sites within each host genus,  
 178 measured by Shannon Index of diversity (SI) and observed ASV richness (obs); n corresponds to number of  
 179 libraries included in each calculation (following quality filtering).

| Host Family      | Host Genus           | Fecal |     |                    | Oral |     |                   | Skin |      |                   |
|------------------|----------------------|-------|-----|--------------------|------|-----|-------------------|------|------|-------------------|
|                  |                      | SI    | obs | $n_{fecal}$        | SI   | obs | $n_{oral}$        | SI   | obs  | $n_{skin}$        |
| Emballonuridae   | <i>Chaerephon</i>    | 1.16  | 52  | 12                 | 1.39 | 57  | 14                | 3.57 | 547  | 14                |
| Hipposideridae   | <i>Hipposideros</i>  | 1.70  | 79  | 65                 | 2.01 | 155 | 52                | 4.95 | 439  | 74                |
|                  | <i>Macronycteris</i> | 1.82  | 74  | 9                  | 2.12 | 110 | 9                 | 4.94 | 883  | 7                 |
| Miniopteridae    | <i>Miniopterus</i>   | 1.41  | 70  | 92                 | 1.55 | 87  | 74                | 4.12 | 403  | 114               |
| Molossidae       | <i>Coleura</i>       | 1.59  | 52  | 11                 | 0.38 | 41  | 11                | 4.01 | 566  | 11                |
|                  | <i>Otomops</i>       | 0.88  | 53  | 26                 | 0.35 | 22  | 26                | 3.88 | 288  | 33                |
| Nycteridae       | <i>Nycteris</i>      | 1.60  | 80  | 10                 | 1.62 | 78  | 14                | 4.48 | 807  | 14                |
| Pteropodidae     | <i>Epomophorus</i>   | 1.44  | 49  | 11                 | 1.42 | 46  | 11                | 3.78 | 566  | 13                |
|                  | <i>Micropteropus</i> | 1.90  | 39  | 3                  | 2.21 | 39  | 4                 | 2.30 | 84   | 3                 |
|                  | <i>Myonycteris</i>   | 1.14  | 117 | 4                  | 1.29 | 195 | 5                 | 5.21 | 1246 | 4                 |
|                  | <i>Rousettus</i>     | 1.62  | 93  | 32                 | 1.95 | 84  | 34                | 4.90 | 1207 | 34                |
|                  | <i>Stenonycteris</i> | 1.55  | 61  | 41                 | 1.72 | 97  | 38                | 4.59 | 855  | 33                |
| Rhinolophidae    | <i>Rhinolophus</i>   | 1.34  | 62  | 58                 | 1.95 | 81  | 59                | 4.71 | 543  | 79                |
| Rhinonycteridae  | <i>Triaenops</i>     | 1.69  | 82  | 9                  | 1.28 | 414 | 9                 | 4.03 | 508  | 10                |
| Vespertilionidae | <i>Myotis</i>        | 1.62  | 54  | 1                  | 1.33 | 72  | 6                 | 5.41 | 771  | 3                 |
|                  | <i>Neoromicia</i>    | 2.13  | 65  | 4                  | 1.47 | 37  | 4                 | 3.76 | 267  | 4                 |
|                  | <i>Pipistrellus</i>  | 1.05  | NA  | 1                  | NA   | NA  | 0                 | 4.80 | 360  | 2                 |
|                  | <i>Scotoecus</i>     | 1.86  | 92  | 4                  | 1.97 | 17  | 3                 | 4.20 | 360  | 4                 |
|                  | <i>Scotophilus</i>   | 1.23  | 64  | 3                  | 0.38 | 96  | 1                 | 4.08 | 459  | 2                 |
| Mean             |                      | 1.51  | 69  | $n_{fecal}$<br>396 | 1.47 | 96  | $n_{oral}$<br>374 | 4.30 | 587  | $n_{skin}$<br>458 |

180  
181

182 3) Microbial communities significantly correlate with geographic locality, anatomical site,  
 183 and host taxonomy, but not host phylogeny

184

185 Permutational analysis of variance (PERMANOVA) identified geographic  
 186 locality, host taxonomy, and anatomical sampling site (gut, oral, skin) as significant  
 187 factors explaining variation in three independent measures of microbial beta diversity  
 188 (Bray-Curtis, unweighted UniFrac, and weighted UniFrac) ( $p < 0.001$ , ADONIS) (Table

189 3). Measures of intraspecific beta dispersion among weighted UniFrac, unweighted  
190 UniFrac, and Bray-Curtis distances showed a continuum of dissimilarities across host  
191 species (Fig. S2); mean beta dispersion differed significantly between anatomical sites by  
192 all three dissimilarity measures (Dunn's Test, Bonferroni corrected  $p$ -value  $p < 0.001$ .)  
193 Analysis of sites by elevation revealed that bats at higher elevations tended to host  
194 increased Shannon diversity (SI) and observed richness (OR) across oral (SI:  $R^2 = 0.076$ ,  
195  $p < 3.1e-9$ ; OR:  $R^2 = 0.038$ ,  $p < 2.5e-5$ ), and skin (SI:  $R^2 = 0.16$ ,  $p < 2.2e-16$ ; OR:  $R^2 =$   
196  $0.100$ ,  $p < 2.5e-14$ ) microbiomes (Fig. S3).

197       Across all bat species, the gut microbiome was enriched for Proteobacteria (avg  
198 55.4%) (Enterobacteraceae, avg 50.0%) and Firmicutes (avg 21%) (Clostridiaceae, avg  
199 9.5%; Streptococcaceae, avg 5.5%). Oral microbiota were also enriched for Proteobacteria  
200 (avg 64.3%) (Pasteurellaceae, avg 47.5%; Neisseriaceae, avg 8.3%) and Firmicutes (avg  
201 11.4%) (Streptococcaceae, avg 8.8%; Gemellaceae, avg 3.61%). The skin microbiome was  
202 not enriched for a single bacterial family, and showed a pronounced increase in relative  
203 abundance of Actinobacteria (avg 10%) (Mycobacteraceae, avg 4.1%;  
204 Pseudonocardiaaceae, avg 2.8%; Nocardiaaceae, avg 2.3%) and Bacteroidetes  
205 (Moraxellaceae, avg 5.6%), and Euryarchaeota (Halobacteraceae, avg 4.2%) (Fig. 3).

206       Fruit bats (pteropodids) showed enrichment of Clostridiaceae in the gut (avg  
207 24.8%) and Streptococcaeae in the oral microbiome (avg 31.0%) compared to all other  
208 bats. The oral microbiota of several insectivorous bat families were enriched for  
209 Firmicutes in the Mycoplasmataceae family (nycterids, avg 25.5% ; rhinolophids, avg  
210 13.8%; miniopterids, avg 8.4%). The skin microbiota of several insectivorous bat families

211 were enriched for Firmicutes in the Bacillaceae family (molossids, 14.0%; hipposiderids,  
 212 8.6%; nycterids, 8.6%; rhinolophids, 6.3%).

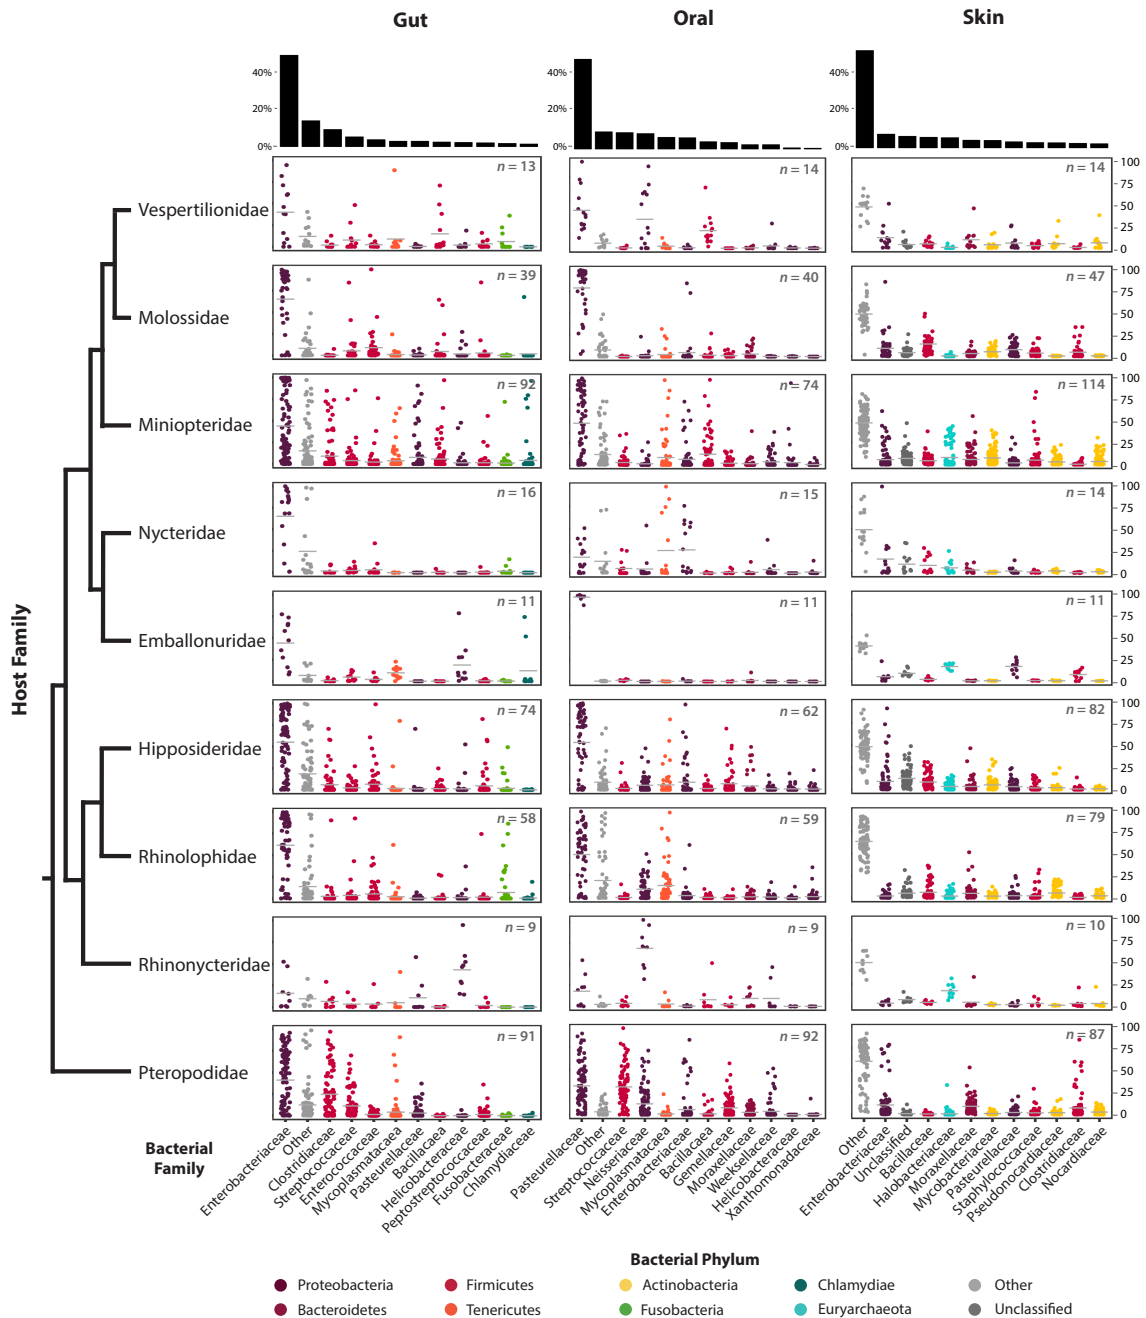

213

214 Figure 3. Relative abundance of top 11 bacterial families identified in gut, oral, and skin

215 microbiomes of bats. Individual points correspond to libraries. Bacterial families are



216 colored according to bacterial phylum. Number of libraries is indicated in the upper  
217 right-hand corner of each plot. Black bar graphs indicate average relative abundances.  
218

219 Host phylogeny from bat specimens collected during this study was reconstructed  
220 to test for significance of phylosymbiosis between bat species and their microbiome  
221 (Supplemental Figure 5; Figure 4). Mantel tests of host phylogenetic distances and  
222 microbial community dissimilarity (weighted (wuf) and unweighted UniFrac (uf)  
223 distances) revealed no correlation for gut (wuf:  $R^2 = -0.045$ ,  $p = 0.63$ ; uf:  $R^2 = -0.052$ ,  $p =$   
224  $0.64$ ), oral (wuf:  $R^2 = -0.11$ ,  $p = 0.88$ ), and skin (wuf:  $R^2 = -0.081$ ,  $p = 0.79$ ; uf:  $R^2 = -$   
225  $0.108$ ,  $p = 0.92$ ) microbiota and host phylogenetic distance, with the exception of oral uf  
226 dissimilarity and host phylogenetic distance (uf:  $R^2 = 0.223$ ,  $p = 0.02$ ) (Fig. 4).

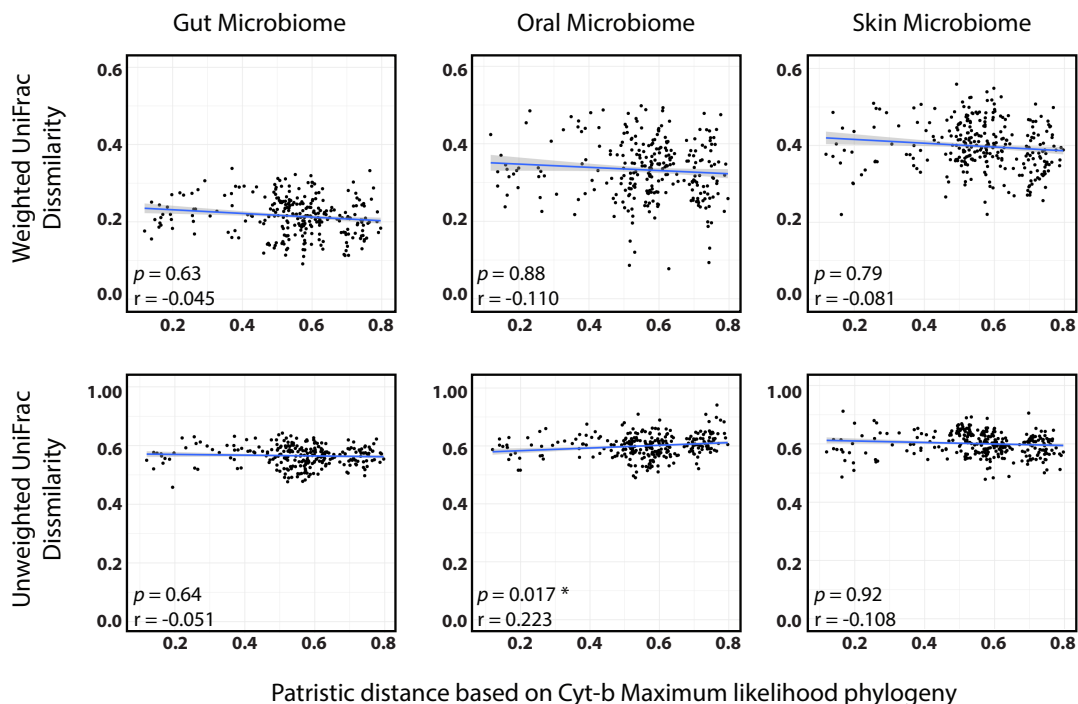

227

228 Figure 4. Rate of microbiome divergence across phylogenetic distance of bats. Strengths of  
229 correlations assessed by Mantel tests (10,000 permutations) of microbial community  
230 dissimilarity (unweighted and weighted UniFrac) and patristic distances calculated from a  
231 maximum likelihood hypothesis of bat species from this study. Asterisk indicates significant  
232 correlation ( $p < 0.05$ ) as determined by Mantel test.

233

234 4) Bat skin microbiome is associated with parasitism in African bats

235

236 To test for significant associations between bacterial communities and eukaryotic  
237 parasites (obligate ectoparasitic dipteran insects, and obligate endoparasitic malarial  
238 parasites), we employed a combination of machine learning techniques, network analyses,  
239 and DESeq2 models (see methods). PERMANOVA analysis identified ectoparasite  
240 status and malarial infection status as significant predictors of bacterial beta diversity  
241 dissimilarity among skin and oral microbiota, respectively ( $p < 0.001$ , ADONIS). Tests of  
242 three independent measures of beta diversity (weighted UniFrac, unweighted UniFrac,  
243 and Bray-Curtis) produced congruent results, with the exception of oral microbiome,  
244 which was not significantly predictive of malarial infection based on unweighted UniFrac  
245 analysis (Table 4).

246

247

248

249

250 Table 4. Permutational multivariate analysis of variance using distance matrices, with distance matrices  
 251 among sources of variation partitioned by host taxonomy (species nested within genus), ectoparasite  
 252 status, malarial infection status, and locality included as strata; \* indicates p-value < 0.05.  
 253  
 254

| Site  | Partition Variable     | Weighted UniFrac |       |        | Unweighted UniFrac |       |        | Bray-Curtis |       |        |
|-------|------------------------|------------------|-------|--------|--------------------|-------|--------|-------------|-------|--------|
|       |                        | F                | R2    | Pr(>F) | F                  | R2    | Pr(>F) | F           | R2    | Pr(>F) |
| Fecal | (Host genus (species)) | 4.27             | 0.162 | 0.001* | 3.15               | 0.120 | 0.001* | 2.89        | 0.110 | 0.001* |
|       | Ectoparasite status    | 0.47             | 0.001 | 0.912  | 1.42               | 0.004 | 0.048* | 1.40        | 0.004 | 0.097  |
|       | Malarial status        | 1.34             | 0.004 | 0.21   | 1.33               | 0.004 | 0.077  | 1.98        | 0.005 | 0.011* |
| Oral  | (Host genus (species)) | 6.82             | 0.279 | 0.001* | 3.50               | 0.143 | 0.001* | 6.69        | 0.274 | 0.001* |
|       | Ectoparasite status    | 0.51             | 0.001 | 0.836  | 1.41               | 0.004 | 0.057  | 1.00        | 0.003 | 0.447  |
|       | Malarial status        | 2.78             | 0.008 | 0.015* | 1.17               | 0.003 | 0.2    | 1.98        | 0.006 | 0.019* |
| Skin  | (Host genus (species)) | 7.68             | 0.329 | 0.001* | 3.98               | 0.170 | 0.001* | 5.60        | 0.240 | 0.001* |
|       | Ectoparasite status    | 2.42             | 0.006 | 0.01*  | 1.54               | 0.004 | 0.02*  | 2.07        | 0.005 | 0.001* |
|       | Malarial status        | 0.92             | 0.002 | 0.513  | 1.02               | 0.002 | 0.363  | 1.06        | 0.003 | 0.32   |

255  
 256

257 Supervised machine learning analyses (random forests) produced models that  
 258 could classify the anatomical source of microbial communities and the host genus of gut,  
 259 oral, and skin microbial samples with reasonable accuracy (ratio of baseline to observed  
 260 classification error  $\geq 2$ ; *i.e.* random forest models performed at least twice as well as  
 261 random). Random forest models also performed accurately when classifying ectoparasite  
 262 status based on skin bacterial community composition, but were less accurate for  
 263 classification of malarial status based on oral bacterial community composition (Table 5).

264  
 265  
 266  
 267

268 Table 5. Supervised machine learning results, showing random forest model performance with respect to  
269 different classification variables and input data sets (fecal, oral, skin microbiome). Model performance is  
270 assessed by measuring the ratio of Out-of-bag estimated error (OOB) to baseline error.  
271

| Classification variable              | Input Data | Baseline error | OOB error | Baseline:OOB |
|--------------------------------------|------------|----------------|-----------|--------------|
| Anatomical site                      | All data   | 0.68           | 0.14      | 4.8          |
| Host Genus                           | Skin       | 0.75           | 0.17      | 4.3          |
| Host Genus                           | Oral       | 0.78           | 0.24      | 3.2          |
| Host Genus                           | Gut        | 0.77           | 0.35      | 2.2          |
| Ectoparasite Status                  | Skin       | 0.53           | 0.27      | 2.0          |
| Malarial Status (Miniopteridae only) | Oral       | 0.46           | 0.38      | 1.2          |

272  
273

274           Following the application of statistical and machine learning approaches, we  
275 employed network analyses to characterize the co-occurrence topology of microbial  
276 communities (in terms of the relative abundance of co-occurring ASVs) across the skin  
277 microbiota of our four most well-sampled bat families (Hipposideridae ( $n = 80$ ),  
278 Miniopteridae ( $n = 116$ ), Rhinolophida ( $n = 88$ ), and Pteropodidae ( $n = 106$ )). Network  
279 analyses produced strikingly consistent results, revealing a significant decrease in cluster  
280 size ( $p < 0.05$ , Mann-Whitney-Wilcoxon rank sum test) and median node degree ( $p <$   
281  $0.05$ ,  $t$  test), as well as reduced network connectivity for parasitized bats from three of the  
282 four bat families examined (Fig. 5; Fig. S4).

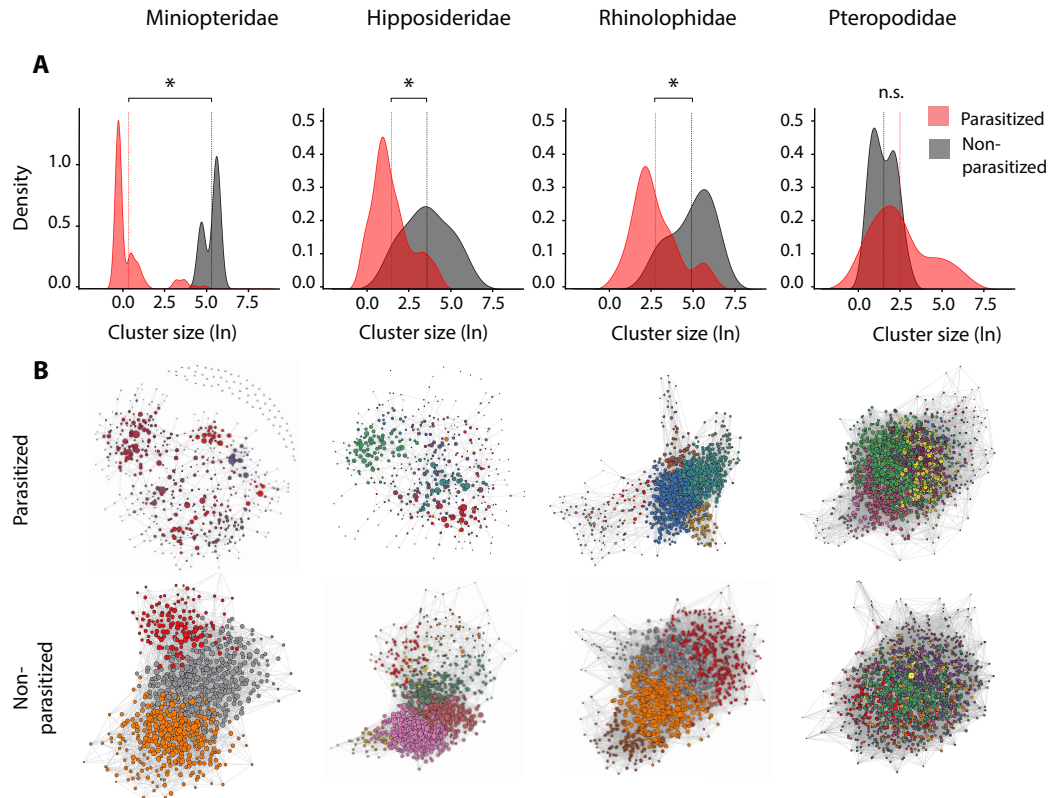

283

284 Figure 5. (A) Distribution of skin microbial network clusters for parasitized and non-  
285 parasitized bats, grouped by bat family (asterisks indicate significance at  $p < 0.005$ ,  
286 Kruskal-Wallis) (B) Visualization of skin bacterial networks (based on Fruchterman-  
287 Reingold algorithm); colored nodes correspond to unique clusters of co-occurring ASVs  
288 within each network.

289

290 5) Bacterial taxa on skin correlated with presence or absence of obligate dipteran  
291 ectoparasites

292

293 DESeq2 analyses of the skin microbiota in four well-sampled bat families

294 (Hipposideridae, Miniopteridae, Rhinolophidae, Pteropodidae) identified a number of

295 ASVs that were significantly associated with either ectoparasitized or non-ectoparasitized  
296 bats (Fig. 6). Overall, we identified 89 and 24 ASVs significantly associated with  
297 parasitized and non-parasitized bats, respectively (Table S3). Bacterial classes with the  
298 greatest representation among significant results were Actinobacteria (16 families),  
299 Gammaproteobacteria (11 families), Bacilli (5 families), and Alphaproteobacteria (3  
300 families). ASVs significantly enriched in parasitized bats from at least three out of four  
301 bat families included Mycobacteraceae (Actinobacteria), and Xanthomonadaceae  
302 (Gammaproteobacteria). ASVs significantly enriched in parasitized bats from at least two  
303 out of four bat families included Hyphomicrobiaceae (Alphaproteobacteria),  
304 Alcaligenaceae (Betaproteobacteria), Moraxellaceae (Gammaproteobacteria),  
305 Planococcaceae (Bacilli), Flavobacteraceae (Flavobacteria), Halobacteraceae  
306 (Halobacteria), and Chitinophagaceae (Saprospirae) (Fig. 6).

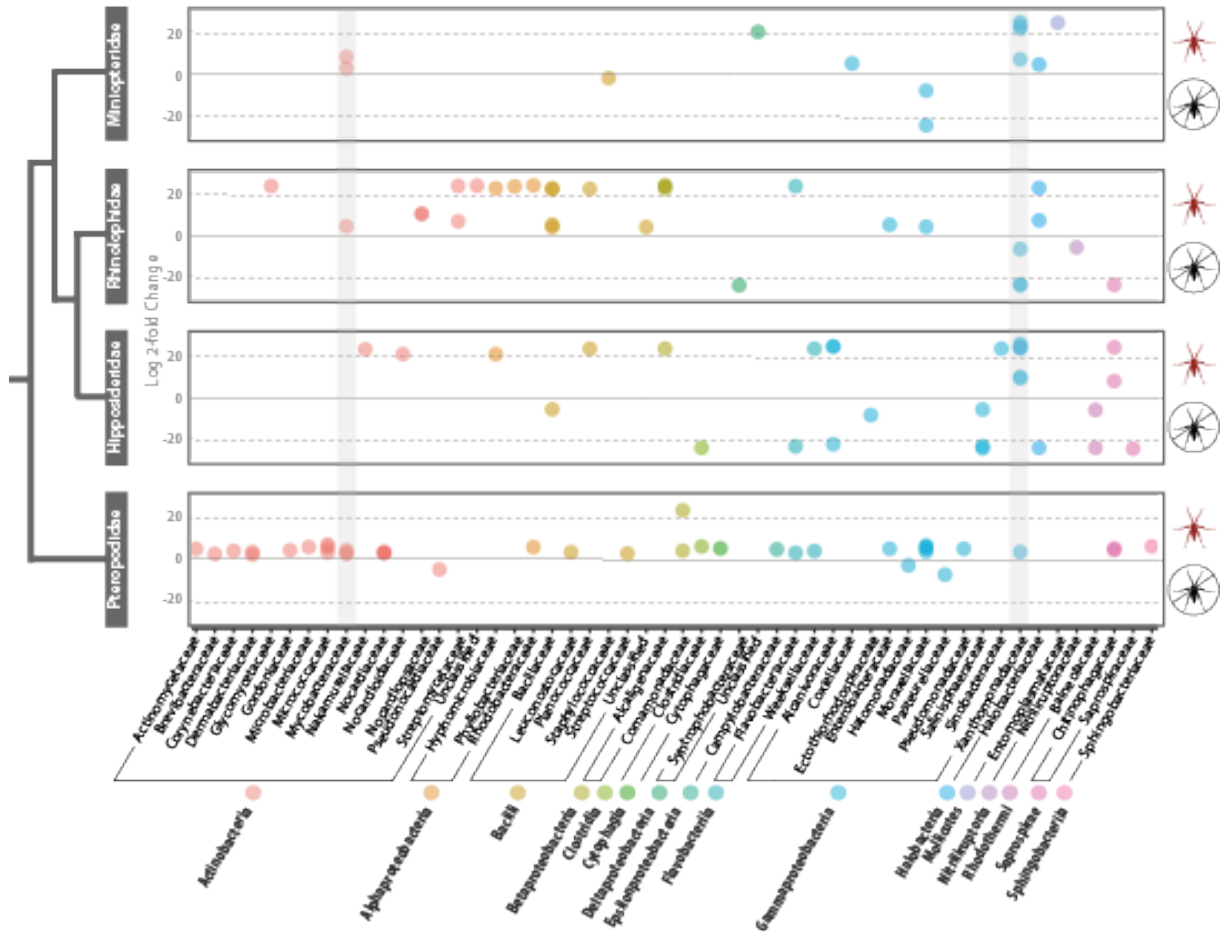

307

308 Figure 6. Log<sub>2</sub>fold change in relative abundance of skin-associated ASVs from the four  
 309 most-sampled bat families estimated with DESeq2. ASVs shown were found to be  
 310 significantly associated with ectoparasite status in bats based on analysis of negative  
 311 binomial distributions of relative abundance (Benjamini-Hochberg FDR corrected  $p$ -  
 312 value  $p < 0.05$ ). Positive values correspond to ASVs found to be enriched on parasitized  
 313 bats, and negative values correspond to ASVs found to be enriched on non-parasitized  
 314 bats. Gray bars highlight ASVs in bacterial families that were enriched in parasitized bats  
 315 for three out of four bat families.

316

317

## 318 DISCUSSION

319

320 The bacterial diversity we observed among gut, oral, and skin microbiota of bats  
321 fall within ranges similarly observed in other vertebrate groups (3, 20-23). Although few  
322 studies have simultaneously compared gut, oral, and skin microbiota from the same  
323 individuals, our data reflect an apparent trend in the literature of skin bacterial diversity  
324 among vertebrates significantly outnumbering gut or oral bacterial diversity (24-27). Our  
325 data corroborate the findings of Nishida and Ochman (3), revealing no relationship  
326 between chiropteran phylogeny and gut bacterial community dissimilarity. We also found  
327 the same absence of phylogenetic signal among oral and skin microbial communities. As  
328 suggested in other studies of volant vertebrates (bats and birds), convergent adaptations  
329 driven by the evolution of flight may be influencing the nature and composition of  
330 microbial communities in both bats and birds (28-30). This differs markedly from studies  
331 of other non-volant mammals, such as primates and rodents, for which phylogenetic  
332 relatedness is generally a significant predictor of microbial community dissimilarity (21,  
333 31-33).

334 Microbial community specificity can be assessed as a function of intraspecific  
335 variation in dissimilarity (beta dispersion), where a low variance of dispersion suggests a  
336 tight and perhaps co-evolutionary link between hosts and symbionts, and a high variance  
337 of dispersion suggests more random or non-specific associations between hosts and  
338 symbionts (34). Measures of beta dispersion among bat species revealed a continuum for  
339 all three anatomical sites, with oral bacterial communities showing lower levels of beta  
340 dispersion than gut or skin communities (Fig. S2). Given that we found no correlation



341 between bacterial community dissimilarity and host phylogenetic distance, and that we  
 342 observed no taxonomic clustering of hosts in mean beta dispersion estimates, variation in  
 343 beta dispersion is likely driven by ecological rather than evolutionary factors.

344 Similar to recent studies in North American bats (35), we found sampling locality  
 345 to be a significant factor influencing skin, gut and oral microbial composition (Table 3).  
 346 Furthermore, we observed an apparent trend in increasing Shannon diversity and  
 347 observed ASV richness along an elevational gradient that was most pronounced for skin  
 348 microbiota (Fig. S3). A positive correlation between bacterial richness and elevation has  
 349 been observed in studies of amphibian skin (36) and montane soil, and this pattern may  
 350 be the result of climatological and other abiotic factors (*e.g.* pH) found along elevational  
 351 gradients (37, 38).

352 Table 3. Permutational multivariate analysis of variance using distance matrices, with distance matrices  
 353 among sources of variation partitioned by host taxonomy (species nested within genus), locality, and  
 354 anatomical site; \* indicates p-value < 0.05.  
 355  
 356

| Partition Variable | Weighted UniFrac |        |        | Unweighted UniFrac |       |        | Bray-Curtis |       |        |
|--------------------|------------------|--------|--------|--------------------|-------|--------|-------------|-------|--------|
|                    | SumSq            | F      | Pr(>F) | SumSq              | F     | Pr(>F) | SumSq       | F     | Pr(>F) |
| Anatomical site    | 10.67            | 198.01 | 0.001* | 56.52              | 82.90 | 0.001* | 38.2        | 36.97 | 0.001* |
| Host Genus         | 3.77             | 13.09  | 0.001* | 25.54              | 7.02  | 0.001* | 85.30       | 15.06 | 0.001* |
| Locality           | 1.56             | 11.00  | 0.001* | 20.62              | 11.34 | 0.001* | 23.85       | 8.42  | 0.001* |
| Host Genus:species | 1.39             | 4.08   | 0.001* | 11.20              | 2.59  | 0.001* | 25.25       | 1.33  | 0.001* |

357  
 358

359 We found the general composition of gut microbiota in East African bats to be  
 360 similar to that of Neotropical bats, with Proteobacteria being the dominant bacterial  
 361 phylum present (39). Regardless of diet (insectivorous or frugivorous), the distal bat gut is  
 362 dominated by bacteria in the family Enterobacteriaceae (Phylum: Proteobacteria), though

363 fruit bats do have an increased relative abundance of bacteria in the family Clostridiaceae  
364 (Phylum: Firmicutes) relative to insectivorous bats. In their study of neotropical bats,  
365 Phillips et al. (40) noted an increased relative abundance of Lactobacillales in frugivorous  
366 bats, and we note a similar pattern among pteropodid fruit bats in this study, which  
367 exhibited a slightly higher proportion of Streptococcaceae (Order: Lactobacillales)  
368 relative to insectivorous bats (Fig. 3). Overall, the predominant enrichment of the  
369 chiropteran gut by Proteobacteria differs markedly from other mammalian gut  
370 microbiomes, which are generally dominated by Firmicutes (21, 41, 42).

371       Among most bat families, the oral microbiome was dominated by Pasteurellaceae  
372 (Phylum: Proteobacteria), and in some cases a high relative abundance of bacteria in the  
373 families Mycoplasmataceae (in nycterids), Neisseriaceae (in vespertilionids and  
374 rhinonycterids), and Streptococcaceae (in pteropodids) was also observed. Although the  
375 oral microbiome has received less attention than that of the gut, several studies have  
376 found diverse Pasteurellaceae and Neisseria lineages present in the oral microbiota of  
377 animals, including domestic cats (20) and marine mammals (43). Pasteurellaceae lineages  
378 have also recently been documented in the oral microbiota of Tasmanian devils (23, 44).  
379 In humans, Pasteurallaceae (genera *Haemophilus* and *Aggregatibacter*) and Neisseriaceae  
380 (genera *Neisseria*, *Kingella*, and *Eikenella*) play an important role in the formation  
381 supragingival plaque (22). Though these bacterial groups are present in lower proportions  
382 in other animals relative to bats, their presence in a broad range of host taxa suggest a  
383 conserved evolutionary niche.

384       Our analysis identified links between ectoparasitism, malarial parasitism, and  
385 bacterial communities on the skin and in oral cavities, respectively. Network analyses

386 identified consistent, stable, and species-rich clusters of bacteria on the skin of non-  
387 ectoparasitized bats, compared to relatively disconnected and apparently transient bacteria  
388 on the skin of bats harboring ectoparasites. This result mirrors that found in human-  
389 mosquito interactions, in which individuals with lower bacterial diversity on the skin are  
390 significantly more attractive to blood-seeking mosquitoes than individuals with higher  
391 diversity (45). In humans, skin bacteria play a known role in attracting mosquitoes via  
392 their production of volatile organic compounds (VOCs), and studies have shown that  
393 variation in skin microbial community composition can increase or decrease human  
394 attractiveness to blood-seeking mosquitoes (45-47). Similar mechanisms may be at play  
395 in the bat-ectoparasite system, particularly given the phylogenetic proximity of  
396 hippoboscoid bat parasites to mosquitoes.

397         Several bacterial families exhibited significant associations with presence of  
398 ectoparasitism in bats based on DESeq analyses. Bacteria found across multiple host  
399 families included (but were not limited to) Alcaligenaceae, Chitinophagaceae,  
400 Flavobacteriaceae, Moraxellaceae, Mycobacteriaceae (*Mycobacterium* spp.), and  
401 Xanthomonadaceae. In many cases, these bacterial families were associated with  
402 parasitism in some bat families, and absence of parasitism in others, suggesting a  
403 potential mechanism by which ectoparasites might be distinguishing between “correct”  
404 and “incorrect” hosts. As suggested by human-mosquito interaction studies (45, 46, 48),  
405 bacteria positively associated with increased rates of blood-feeding dipteran host selection  
406 may be producing VOCs on which the insects rely to identify their hosts. Bacteria that  
407 are negatively associated with such insects may be consuming the products of the former,  
408 or may be producing VOCs of their own that mask those of the former (suggested by

409 Verhulst et al. (45)). To better understand the mechanisms underlying these correlations  
410 in wild populations, future experiments should consider including sampling of VOCs *in*  
411 *vivo*.

412 PERMANOVA analyses identified associations between the oral microbiome  
413 and malarial parasite prevalence among bats in the family Miniopteridae, although these  
414 associations were less robust than those of the skin bacteria and ectoparasitism. Upon  
415 further exploration of this potential association, we identified a single bacterial ASV in  
416 the genus *Actinobacillus* (99% similar to *A. porcinus* based on NCBI blastn search) as  
417 significantly reduced in malaria-free bats (baseMean 7.61, -24.2 log<sub>2</sub>FoldChange,  $p =$   
418 1.7E-20). Network analyses indicated no significant differences in connectivity or node  
419 degree distribution (results not shown). Because no other bat groups experienced rates of  
420 malarial parasitism adequate for statistical analyses, we were unable to explore this  
421 relationship further. Future studies that incorporate greater sampling of malaria-positive  
422 species may reveal more robust microbial associations, as have been documented in  
423 numerous experiments with controlled rodent and human malaria infections (48-50).

424 Although we cannot ascertain causality of differences in the microbial  
425 composition of skin in this study, our results support the hypothesis that these differences  
426 suggest a mechanism by which ectoparasites can locate or distinguish hosts. Alternatively,  
427 observed differences in microbial composition could result from microbial transfer from  
428 parasites to hosts. Given the known effect of locality and apparent absence of host  
429 phylogenetic signal in microbial community composition of skin, one possible  
430 explanation is that local environmental variables play a greater role in determining host-  
431 bacteria associations in bats. Indeed, in North America, multiple bat species have been

432 found to share many bacterial genera with soil and plant material (35). Thus, local  
433 conditions and bacterial composition of bat roosts are likely playing an important role in  
434 driving the composition of skin bacteria of bats.

435

## 436 METHODS

437

### 438 1) Sampling

439

440 Sampling for this study was conducted from the eastern coast of Kenya to the northern  
441 border of Uganda during August–October 2016 (Fig. 1; Table S1, S2). Nine families and  
442 nineteen genera of bats (order: Chiroptera) were collected as part of bird and small  
443 mammal biodiversity inventories. All sampling was conducted in accordance with the  
444 Field Museum of Natural History IACUC and voucher specimens are accessioned at the  
445 Field Museum of Natural History (Table S2). Blood samples were collected and screened  
446 for haemosporidia, and haemosporidian taxonomy was assigned using previously  
447 described molecular methods (13). Following blood sampling, ectoparasites were  
448 removed with forceps and placed directly into 95% EtOH; ectoparasites taxonomy was  
449 assigned based on morphological features. For the purposes of analysis with microbiome  
450 data, ectoparasite and malarial status were each scored separately as 1 (present) or 0  
451 (absent). Gut, skin, and oral samples were taken for each bat for microbial analyses. Gut  
452 samples consisted of fecal material collected directly from the distal end of the colon  
453 using sterilized tools, and preserved on Whatman® FTA® cards for microbiome analyses.  
454 For oral microbiome analyses, we preserved both buccal swabs in  $LN_2$  and tongue biopsies

455 in 95% ethanol (EtOH). Comparison of ASV diversity obtained from paired subsets of  
456 each sample type revealed greater diversity recovered from tongue biopsies (data not  
457 shown); tongues were therefore used for characterization of oral microbiomes in this  
458 study. Lastly, skin samples from five regions of the body (ear, wing membrane, tail  
459 membrane, chest, back) were collected and pooled in 95% EtOH using sterile Integra®  
460 Miltex® 5mm biopsy punches. The goal of sampling from five body regions was to  
461 maximize bacterial diversity recovered from the external skin surface of each individual.  
462 We based our storage media selections on the recent study by Song et al. (51).

463

464 2) Microbiome sequencing, characterization, and parasite association

465

466 DNA extractions were performed on gut, tongue, and skin samples using the MoBio  
467 PowerSoil 96 Well Soil DNA Isolation Kit (Catalog No. 12955-4, MoBio, Carlsbad,  
468 CA, USA). We used the standard 515f and 806r primers (52-54) to amplify the V4  
469 region of the 16S rRNA gene, using mitochondrial blockers to reduce amplification of  
470 host mitochondrial DNA. Sequencing was performed using paired-end 150 base reads  
471 on an Illumina HiSeq sequencing platform. Following standard demultiplexing and  
472 quality filtering using the Quantative Insights Into Microbial Ecology pipeline  
473 (QIIME2) (55) and vsearch8.1 (56), ASVs were identified using the Deblur method (19)  
474 and taxonomy was assigned using the Greengenes Database (May 2013 release;  
475 <http://greengenes.lbl.gov>). According to a recent study by McMurdie and Holmes (57),  
476 rarefying 16s data is inappropriate for the detection of differentially abundant species.  
477 However, for the purposes of comparison, we compared both libraries rarefied to a read

478 depth of 10,000 reads and libraries filtered to those contained >1000 reads (negative  
479 controls all contained fewer than 1000 reads and were filtered at this step). Alpha and  
480 beta-diversity analyses produced statistically similar results, with no significant differences  
481 observed between the rarefied and non-rarefied data. We thus chose to report results of  
482 non-rarefied data, based on these observations and the recommendation of McMurdie  
483 and Holmes (57).. Following filtering, data were subset for analyses according to sample  
484 type, host genus, and locality (or some combination thereof). Site-specific analyses were  
485 only performed for sites from which five or more individual bats were sampled. We  
486 calculated alpha diversity for each sample type (gut, oral, skin) using the Shannon index,  
487 and measured species richness based on actual observed diversity. Significance of differing  
488 mean values for each diversity calculation was determined using the Kruskal-Wallis rank  
489 sum test, followed by a post-hoc Dunn test with bonferroni corrected  $p$ -values. Three  
490 measures of beta diversity (unweighted UniFrac, weighted UniFrac, and Bray-Curtis)  
491 were calculated using relative abundances of each ASV (calculated as ASV read depth  
492 over total read depth per library). Significant drivers of community similarity were  
493 identified using the ADONIS test with Bonferroni correction for multiple comparisons  
494 using the R package Phyloseq (58). To assess potential effect of imbalanced sampling, the  
495 ADONIS test was re-run on a subset of data comprising only data from the top four  
496 sampled bat families, which represented even sampling among families and across the  
497 localities from which they were collected. Results of this test (not reported) indicated the  
498 same significant drivers of community similarity as the test run on the entire data set.

499 Additional R packages used for analyses and figure generation included vegan (59),  
500 ggplot2(60), and dplyr(61). For a complete list of packages and code for microbiome  
501 analyses, see <http://github.com/hollylutz/BatMP>.

502

503 3) Bat phylogenetic reconstruction

504

505 DNA from bats collected during this study was extracted and sequenced for  
506 mitochondrial Cytochrome-*b* (*cyt-b*), using the primer pair LGL 765F and LGL 766R  
507 that amplify the entire *cyt-b* gene (Bickham et al. 1995, 2004). DNA extractions, PCR  
508 amplification, and sequencing were carried out as in Demos et al. 2018. The best-  
509 supported model of nucleotide substitution for *cyt-b* was determined using the BIC on the  
510 maximum-likelihood topology estimated independently for each model in  
511 jMODELTEST2 (Darriba et al., 2012) on CIPRES Science Gateway v.3.1 (Miller et al.,  
512 2010). Maximum-likelihood estimates of *cyt-b* gene trees were made using the program  
513 IQ-TREE version 1.6.0 (Nguyen et al. 2017) on the CIPRES portal. Emballonuridae  
514 (*Coleura afra*) was constrained as sister to Nycteridae (*Nycteris arge*, *N. thebaica*;  
515 Amador et al. 2016). We conducted analyses using the ultrafast bootstrap algorithm and  
516 searched for best-scoring ML tree algorithm under the GTR+I+ FreeRate model with  
517 1000 bootstrap replicates. The resulting phylogenetic hypothesis and node support can be  
518 viewed in Fig. S5.

519

520 4) Machine learning and network analyses

521



522 A supervised machine learning approach was used to produce random forests (RF) for the  
523 classification of different variables. RFs were constructed using 1000 decision trees and  
524 subsets of ASV data via the supervised\_learning.py script implemented in QIIME (55),  
525 which utilized 80% of each input data set to train classification models, and tested the  
526 accuracy of the models on the remaining 20% of data. We tested the ability of RFs to  
527 accurately classify 1) anatomical site (using all data), 2) host genus (using gut, oral, or  
528 skin microbial data separately), 3) ecotparasite status (using skin microbial data), and 4)  
529 malarial status (using oral microbial data). Classification categories comprised  
530 approximately equal numbers of samples, with the exception of host genera, which varied  
531 substantially (see Table 1). RF performance was assessed by comparing the out-of-bag  
532 estimated error (OOB) with baseline (random) error. If the ratio of OOB to baseline  
533 error was less than or equal to two, the model was considered to perform reasonably well,  
534 as it performed at least twice as well as random (62). To reconstruct microbial networks  
535 for skin and oral bacterial communities within bat family groupings (which were further  
536 sub-divided into parasitized or non-parasitized), we utilized the R package Sparse Inverse  
537 Covariance Estimation for Ecological Association Inference (SPIEC-EASI) (63). All  
538 network datasets were filtered to contain only ASVs that appeared in at least three  
539 individuals within each respective dataset. We used the neighborhood selection  
540 framework (MB method) with 20 repetitions. Network results produced with SPIEC-  
541 EASI were summarized using the R packages CAVnet (64) and igraph (65). Network  
542 stability was assessed by sequentially removing network nodes (ordered by betweenness  
543 centrality and degree) and observing natural connectivity (*i.e.* eigenvalue of the graph  
544 adjacency matrix) as nodes are removed. To determine which, if any, bacterial ASVs were

545 significantly associated with ectoparasite or malarial prevalence, we performed analyses  
546 based on the negative binomial distribution of ASVs relative abundance, utilizing the R  
547 package DESeq2 (66). For ectoparasite-association tests, the data were subset into four  
548 categories that corresponded to the top-sampled bat families (Hipposideridae,  
549 Miniopteridae, Pteropodidae, and Rhinolophidae), each with similar proportions of  
550 parasitized to non-parasitized individuals (see Table 1). For haemosporidian-associated  
551 tests, only the family Miniopteridae was analyzed, due to highly imbalanced prevalence or  
552 sample sizes across all other families (Table 1). Dispersion estimates and fit tests were  
553 implemented using default DESeq2 parameters. False discovery rate (FDR) was calculated  
554 using the Benjamini-Hochberg method for each of the bat families analyzed, and  $p$ -  
555 values were adjusted accordingly.

556

## 557 ACKNOWLEDGMENTS

558

559 We thank the Kenya Wildlife Service and the Uganda Wildlife Authority for permission  
560 to conduct research in national parks. For logistical support and assistance in the field, we  
561 thank Mike Bartonjo of the National Museums of Kenya, Phausia Kweyu of Karatina  
562 University, Dr. Robert Kityo, Solomon Sebuliba, and Cissy Akoth of the Makerere  
563 University Zoological Museum, Drs. Brian Amman, Jonathan Towner, and Rebecca  
564 Tiller of the Centers for Disease Control and Prevention, and Lauren Lutz. We thank  
565 Neil Gottel for his knowledge and assistance with laboratory processing of microbial  
566 samples, and other members of the Gilbert Lab, including Alyson Yee, Cesar Cardona,

567 Thomas Kuntz, Drs. Bea Penalver, Melissa Dsouza, and Naseer Sangwan for the  
568 assistance with bacterial 16s analyses.

569

## 570 AUTHOR CONTRIBUTIONS

571 H.L.L. designed the research and wrote the first draft; H.L.L., E.W.J. analyzed data;  
572 T.C.D. produced bat phylogeny; H.L.L., P.W.W., W.B.S., J.C.K. conducted field  
573 research; J.A.G., B.D.P. provided funding and research support; all authors contributed to  
574 writing.

575

## 576 REFERENCES

577

578

- 579 1. Human Microbiome Project C (2012) Structure, function and diversity of the  
580 healthy human microbiome. *Nature* 486(7402):207-214.
- 581 2. Thaiss CA, Zmora N, Levy M, & Elinav E (2016) The microbiome and innate  
582 immunity. *Nature* 535(7610):65-74.
- 583 3. Nishida AH & Ochman H (2018) Rates of gut microbiome divergence in  
584 mammals. *Mol Ecol* 27(8):1884-1897.
- 585 4. Moeller AH, *et al.* (2014) Rapid changes in the gut microbiome during human  
586 evolution. *Proc Natl Acad Sci U S A* 111(46):16431-16435.
- 587 5. Kundu P, Blacher E, Elinav E, & Pettersson S (2017) Our Gut Microbiome: The  
588 Evolving Inner Self. *Cell* 171(7):1481-1493.
- 589 6. Li X, *et al.* (2017) Composition of Gut Microbiota in the Gibel Carp (*Carassius*  
590 *auratus gibelio*) Varies with Host Development. *Microb Ecol* 74(1):239-249.
- 591 7. Kolodny o, *et al.* (2017).
- 592 8. McFall-Ngai M, *et al.* (2013) Animals in a bacterial world, a new imperative  
593 for the life sciences. *Proc Natl Acad Sci U S A* 110(9):3229-3236.
- 594 9. Kwiatkowski DP (2005) How malaria has affected the human genome and  
595 what human genetics can teach us about malaria. *Am. J. Hum. Genet.* 77:171-  
596 190.
- 597 10. Dittmar K, Morse, Solo F., Dick, Carl W., Patterson, Bruce D. (2015) Bat fly  
598 evolution from the Eocene to the present (Hippoboscoidea, Streblidae and  
599 Nycteribiidae). *Parasite Diversity and Diversification: Evolutionary Ecology*  
600 *Meets Phylogenetics*, ed S. Morand BRK, D. T. J. Littlewood (Cambridge  
601 University Press, Cambridge, U. K.).

- 602 11. Dick CW, Patterson, B. D. (2006) *Micromammals and Macroparasites: From*  
603 *Evolutionary Ecology to Management* (Springer, Kato Bunmeisha, Japan).
- 604 12. Schaer J, *et al.* (2013) High diversity of West African bat malaria parasites  
605 and a tight link with rodent Plasmodium taxa. *Proceedings of the National*  
606 *Academy of Sciences* 100:17415-17419.
- 607 13. Lutz HL, *et al.* (2016) Diverse sampling of East African haemosporidians  
608 reveals chiropteran origin of malaria parasites in primates and rodents. *Mol*  
609 *Phylogenet Evol* 99:7-15.
- 610 14. Towner JS, *et al.* (2009) Isolation of genetically diverse Marburg viruses from  
611 Egyptian fruit bats. *PLoS Pathog* 5(7):e1000536.
- 612 15. Olival KJ & Hayman DT (2014) Filoviruses in bats: current knowledge and  
613 future directions. *Viruses* 6(4):1759-1788.
- 614 16. Amman BR, *et al.* (2015) A Recently Discovered Pathogenic Paramyxovirus,  
615 Sosuga Virus, is Present in Rousettus aegyptiacus Fruit Bats at Multiple  
616 Locations in Uganda. *J Wildl Dis* 51(3):774-779.
- 617 17. Li W, *et al.* (2005) Bats are natural reservoirs of SARS-like coronaviruses.  
618 *Science* 310:676-679.
- 619 18. Chua KB, *et al.* (2002) Isolation of Nipah virus from Malaysian island flying-  
620 foxes. *Microbes and Infection* 4:145-151.
- 621 19. Amir A, *et al.* (2017) Deblur Rapidly Resolves Single-Nucleotide Community  
622 Sequence Patterns. *mSystems* 2(2).
- 623 20. Sturgeon A, Pinder SL, Costa MC, & Weese JS (2014) Characterization of the  
624 oral microbiota of healthy cats using next-generation sequencing. *Vet J*  
625 201(2):223-229.
- 626 21. Ley RE, *et al.* (2008) Evolution of mammals and their gut microbes. *Science*  
627 320(5883):1647-1651.
- 628 22. Mark Welch JL, Rossetti BJ, Rieken CW, Dewhirst FE, & Borisy GG (2016)  
629 Biogeography of a human oral microbiome at the micron scale. *Proc Natl*  
630 *Acad Sci U S A* 113(6):E791-800.
- 631 23. Brix L, Hansen MJ, Kelly A, Bertelsen MF, & Bojesen AM (2015) Occurrence of  
632 Pasteurellaceae Bacteria in the Oral Cavity of the Tasmanian Devil  
633 (*Sarcophilus Harrisii*). *J Zoo Wildl Med* 46(2):241-245.
- 634 24. Grice EA & Segre JA (2011) The skin microbiome. *Nat Rev Microbiol* 9(4):244-  
635 253.
- 636 25. Ursell LK, *et al.* (2012) The interpersonal and intrapersonal diversity of  
637 human-associated microbiota in key body sites. *J Allergy Clin Immunol*  
638 129(5):1204-1208.
- 639 26. Costello EK, *et al.* (2009) Bacterial community variation in human body  
640 habitats across space and time. *Science* 326(5960):1694-1697.
- 641 27. Chiarello M, Villéger, S., Bouvier, C., Bettarel, Y., Bouvier, T. (2015) High  
642 diversity of skin-associated bacterial communities in marine fishes is  
643 promoted by their high variability among body parts, individuals and species.  
644 *FEMS Microbiol Ecol* 91(7):1-12.
- 645 28. Caviedes-Vidal E, McWhorter, T. J., Lavin, S. R., Chediak, J. G., Tracy, C. R.,  
646 Karasov, W. H. (2007) The digestive adaptation of flying vertebrates: High

- 647 intestinal paracellular absorption compensates for smaller guts. *PNAS*  
648 104(48):19132-19137.
- 649 29. Price ER, Brun A, Caviedes-Vidal E, & Karasov WH (2015) Digestive  
650 adaptations of aerial lifestyles. *Physiology (Bethesda)* 30(1):69-78.
- 651 30. Caviedes-Vidal E, *et al.* (2008) Paracellular absorption: a bat breaks the  
652 mammal paradigm. *PLoS One* 3(1):e1425.
- 653 31. Moeller AH, Car-Qintero, A., Mjungu, D., Georgiev, A. V., Lonsdorf, E. V., Muller,  
654 M. N., Pusey, A. E., Peeters, M., Hahn, B. H., Ochman, H. (2016) Cospeciation of  
655 gut microbiota with hominids. *Science* 353(6297):380-382.
- 656 32. Sanders JG, *et al.* (2015) Baleen whales host a unique gut microbiome with  
657 similarities to both carnivores and herbivores. *Nat Commun* 6:8285.
- 658 33. Moeller AH, *et al.* (2017) Dispersal limitation promotes the diversification of  
659 the mammalian gut microbiota. *Proc Natl Acad Sci U S A* 114(52):13768-  
660 13773.
- 661 34. Thomas T, *et al.* (2016) Diversity, structure and convergent evolution of the  
662 global sponge microbiome. *Nat Commun* 7:11870.
- 663 35. Avena CV, *et al.* (2016) Deconstructing the Bat Skin Microbiome: Influences  
664 of the Host and the Environment. *Front Microbiol* 7:1753.
- 665 36. Muletz Wolz CR, Yarwood SA, Campbell Grant EH, Fleischer RC, & Lips KR  
666 (2018) Effects of host species and environment on the skin microbiome of  
667 Plethodontid salamanders. *J Anim Ecol* 87(2):341-353.
- 668 37. Bryant JA, Lamanna, C., Morlon, H., Kerkhoff, A. J., Enquist, B. J., Green, J. L.  
669 (2008) Microbes and mountainsides: contrasting elevational patterns of  
670 bacterial and plant diversity. *PNAS* 105:11505-11511.
- 671 38. Singh D, *et al.* (2014) Strong elevational trends in soil bacterial community  
672 composition on Mt. Halla, South Korea. *Soil Biology and Biochemistry* 68:140-  
673 149.
- 674 39. Carrillo-Araujo M, *et al.* (2015) Phyllostomid bat microbiome composition is  
675 associated to host phylogeny and feeding strategies. *Front Microbiol* 6:447.
- 676 40. Phillips CD, *et al.* (2012) Microbiome analysis among bats describes  
677 influences of host phylogeny, life history, physiology and geography. *Mol Ecol*  
678 21(11):2617-2627.
- 679 41. Eckburg PB, Bik, E. M., Bernstein, C. N., Purdom, E., Dethlefsen, L., Sargent, M.,  
680 Gill, S. R., Nelson, K. E., Relman, D. A. (2005) Diversity of human intestinal  
681 microbial flora. *Science* 308(5728):1635-1638.
- 682 42. Yildirim S, *et al.* (2010) Characterization of the fecal microbiome from non-  
683 human wild primates reveals species specific microbial communities. *PLoS*  
684 *One* 5(11):e13963.
- 685 43. Bik EM, *et al.* (2016) Marine mammals harbor unique microbiotas shaped by  
686 and yet distinct from the sea. *Nat Commun* 7:10516.
- 687 44. Gutman N, Hansen MJ, Bertelsen MF, & Bojesen AM (2016) Pasteurellaceae  
688 bacteria from the oral cavity of Tasmanian devils (*Sarcophilus Harrisii*) show  
689 high minimum inhibitory concentration values towards aminoglycosides and  
690 clindamycin. *Lett Appl Microbiol* 62(3):237-242.
- 691 45. Verhulst NO, *et al.* (2011) Composition of human skin microbiota affects  
692 attractiveness to malaria mosquitoes. *PLoS One* 6(12):e28991.



- 693 46. Busula AO, Takken W, JG DEB, Mukabana WR, & Verhulst NO (2017)  
694 Variation in host preferences of malaria mosquitoes is mediated by skin  
695 bacterial volatiles. *Med Vet Entomol* 31(3):320-326.
- 696 47. Verhulst NO, *et al.* (2009) Cultured skin microbiota attracts malaria  
697 mosquitoes. *Malar J* 8:302.
- 698 48. Robinson A, *et al.* (2018) Plasmodium-associated changes in human odor  
699 attract mosquitoes. *Proc Natl Acad Sci U S A* 115(18):E4209-E4218.
- 700 49. De Moraes CM, *et al.* (2014) Malaria-induced changes in host odors enhance  
701 mosquito attraction. *Proc Natl Acad Sci U S A* 111(30):11079-11084.
- 702 50. de Boer JG, *et al.* (2017) Odours of Plasmodium falciparum-infected  
703 participants influence mosquito-host interactions. *Sci Rep* 7(1):9283.
- 704 51. Song SJ, Amir, A., Metcalf, J. L., Amato, K. R., Xu, Z. Z., Humphrey, G., Knight, R.  
705 (2016) Preservation methods differ in fecal microbiome stability, affecting  
706 suitability for field studies. *mSystems* 1(3):1 - 12.
- 707 52. Caporaso JG, Lauber, C. L., Walters, W. A., Berg-Lyons, D., Lozupone, C. A.,  
708 Turnbaugh, P. J., Fierer, N., Knight, R. (2011) Global patterns of 16S rRNA  
709 diversity at a depth of millions of sequences per sample. *PNAS* 108:4516-  
710 4522.
- 711 53. Caporaso JG, *et al.* (2012) Ultra-high-throughput microbial community  
712 analysis on the Illumina HiSeq and MiSeq platforms. *ISME J* 6(8):1621-1624.
- 713 54. Kozich JJ, Westcott, S. L., Baxter, N. T., Highlander, S. K., Schloss, P. D. (2013)  
714 Development of a dual-index sequencing strategy and curation pipeline for  
715 analyzing amplicon sequence data on the MiSeq Illumina sequencing  
716 platform. *Applied and Environmental Microbiology* 79(17):5122-5120.
- 717 55. Caporaso JG, Kuczynski, J., Stombaugh, J., Bittinger, K., Bushman, F. D.,  
718 Costello, E. K., Fierer, N., Gonzalez Peña, A., Goodrich, E. K., Gordon, J. I.,  
719 Huttley, G. A., Kelley, S. T., Knights, D., Koenig, J. E., Ley, R. E., Lozupone, C. A.,  
720 McDonald, D., Muegge, B. D., Pirrung, M., Reeder, J., Sevinsky, J. R., Turnbaugh,  
721 P. J., Walters, W. A., Widmann, J., Yatsunencko, T., Zaneveld, J., Knight, R.  
722 (2010) QIIME allows analysis of high-throughput community sequencing  
723 data. *Nature Methods* 7(5):335 - 336.
- 724 56. Rognes T, Flouri T, Nichols B, Quince C, & Mahe F (2016) VSEARCH: a  
725 versatile open source tool for metagenomics. *PeerJ* 4:e2584.
- 726 57. McMurdie PJ, Holmes, S. (2014) Waste not, want not: Why rarefying  
727 microbiome data is inadmissible. *PLoS Comput Biol* 10(4):1-12.
- 728 58. McMurdie PJ & Holmes S (2013) phyloseq: an R package for reproducible  
729 interactive analysis and graphics of microbiome census data. *PLoS One*  
730 8(4):e61217.
- 731 59. Oksanen J, *et al.* (2018) vegan: Community Ecology Package), R package  
732 version 2.5-2.
- 733 60. Wickham H (2016) *ggplot2: Elegant Graphics for Data Analysis* (Springer-  
734 Verlag, New York, NY).
- 735 61. Wickham H, François R, Henry L, & Müller K (2018) dplyr: A Grammar of  
736 Data Manipulation), R package version 0.7.6.
- 737 62. Breiman L (2001) Random Forests. *Machine Learning* 45:5-32.

- 738 63. Kurtz ZD, *et al.* (2015) Sparse and compositionally robust inference of  
739 microbial ecological networks. *PLoS Comput Biol* 11(5):e1004226.  
740 64. Cardona C (2017) CAVNet: Creation Analysis and Visualization of Networks).  
741 65. Csardi G, Nepusz, T. (2006) The Igraph Software Package for Complex  
742 Network Research. *InterJournal, Complex Systems* 1695.  
743 66. Love MI, Huber W, & Anders S (2014) Moderated estimation of fold change  
744 and dispersion for RNA-seq data with DESeq2. *Genome Biol* 15(12):550.  
745

746

747

748

## 749 FIGURE LEGENDS

750

751 Figure 1. Sampling localities and elevation, grouped by county (see Table S1 for full  
752 locality information). Colors correspond to elevation, and white numbers and size of  
753 points correspond to number of bats collected.

754

755 Figure 2. Alpha diversity of amplicon sequence variants (ASVs) by anatomical sites,  
756 including (A) Observed richness, (B) Shannon index of diversity, (C) ASVs shared  
757 between anatomical sites. Asterisks indicate significant differences between groups  
758 (Dunn's Test, Bonferroni corrected  $p$ -value  $p < 0.0001$ ).

759

760 Figure 3. Percent relative abundance of top 11 bacterial families identified in gut, oral,  
761 and skin microbiomes of bats. Individual points represent the relative abundance of  
762 bacterial families within a single library. Results are faceted by anatomical site and  
763 arranged by host phylogenetic relationship. Bacterial families are colored according to

764 bacterial phylum. Number of libraries is indicated in the upper right-hand corner of each  
765 plot.

766

767 Figure 4. Rate of microbiome divergence across phylogenetic distance of bats. Strengths of  
768 correlations assessed by Mantel tests (10,000 permutations) of microbial community  
769 dissimilarity (unweighted and weighted UniFrac) and patristic distances calculated from a  
770 maximum likelihood hypothesis of bat species from this study. Asterisk indicates significant  
771 correlation ( $p < 0.05$ ) as determined by Mantel test.

772

773 Figure 5. (A) Distribution of skin microbial network clusters for parasitized and non-  
774 parasitized bats, grouped by bat family (asterisks indicate significance at  $p < 0.005$ ,  
775 Kruskal-Wallis) (B) Visualization of skin bacterial networks (based on Fruchterman-  
776 Reingold algorithm); colored nodes correspond to unique clusters of co-occurring ASVs  
777 within each network.

778

779 Figure 6. Log<sub>2</sub>fold change in relative abundance of skin-associated ASVs from the four  
780 most-sampled bat families estimated with DESeq2. ASVs shown were found to be  
781 significantly associated with ectoparasite status in bats based on analysis of negative  
782 binomial distributions of relative abundance (Benjamini-Hochberg FDR corrected  $p$ -  
783 value  $p < 0.05$ ). Positive values correspond to ASVs found to be enriched on parasitized  
784 bats, and negative values correspond to ASVs found to be enriched on non-parasitized  
785 bats. Gray bars highlight ASVs in bacterial families that were enriched in parasitized bats  
786 for three out of four bat families.



787 Supplemental Figures

**Figure S1.** Alpha diversity measures of data rarefied to a read depth of 10,000. A) Observed ASV richness across anatomical site; gut and oral microbial richness differed significantly from skin microbial richness (Kruskal-Wallis chi-squared = 677.01,  $df = 2$ ,  $p < 2.2e-16$ , Dunn's test), but did not differ significantly from each other. B) Density plots of Shannon Index (SI) by anatomical site; SI of skin microbial richness and evenness differed significantly from the SI of both gut and oral microbiomes, which did not differ from each other (Kruskal-Wallis chi-squared = 678.0885,  $df = 2$ ,  $p < 2.2e-16$ , Dunn's test). C) Venn diagram of shared and specific ESVs across different anatomical sites. As with analyses of the non-rarefied data set, skin exhibited the highest diversity (27,825 ASVs), followed by the oral microbiome (10,696 ASVs), and lastly the gut (6,492 ESVs). Rarefying data led to a loss of 1,079 ASVs (4% of total ASVs) that did not appear in any sample after rarefaction, and the removal of 1,079 libraries that had <10,000 reads. D) Mean ASV richness as read depth increases, with removal of libraries containing fewer than the identified number of reads (note - color key in D differs from color key in A-C).

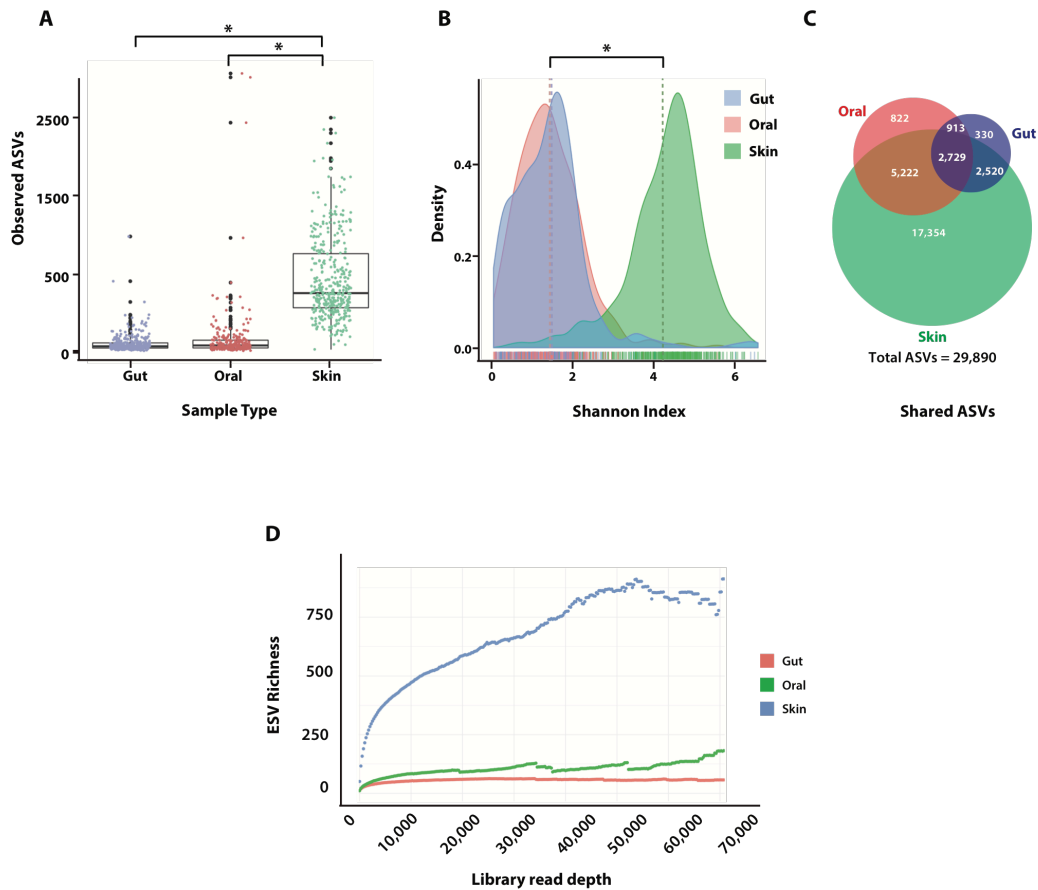

788

**Figure S2.** Intraspecific variation across anatomical sites measured as beta dispersion of (A) unweighted UniFrac, (B) weighted UniFrac, and (C) Bray-Curtis distances. Dotted lines indicate mean dispersion for anatomical groupings; numbers in parentheses indicate sample size per bat species. White and gray boxes correspond to the chiropteran suborders Yangochiroptera (microbats) and Yinpterochiroptera (fruit bats and kin), respectively.

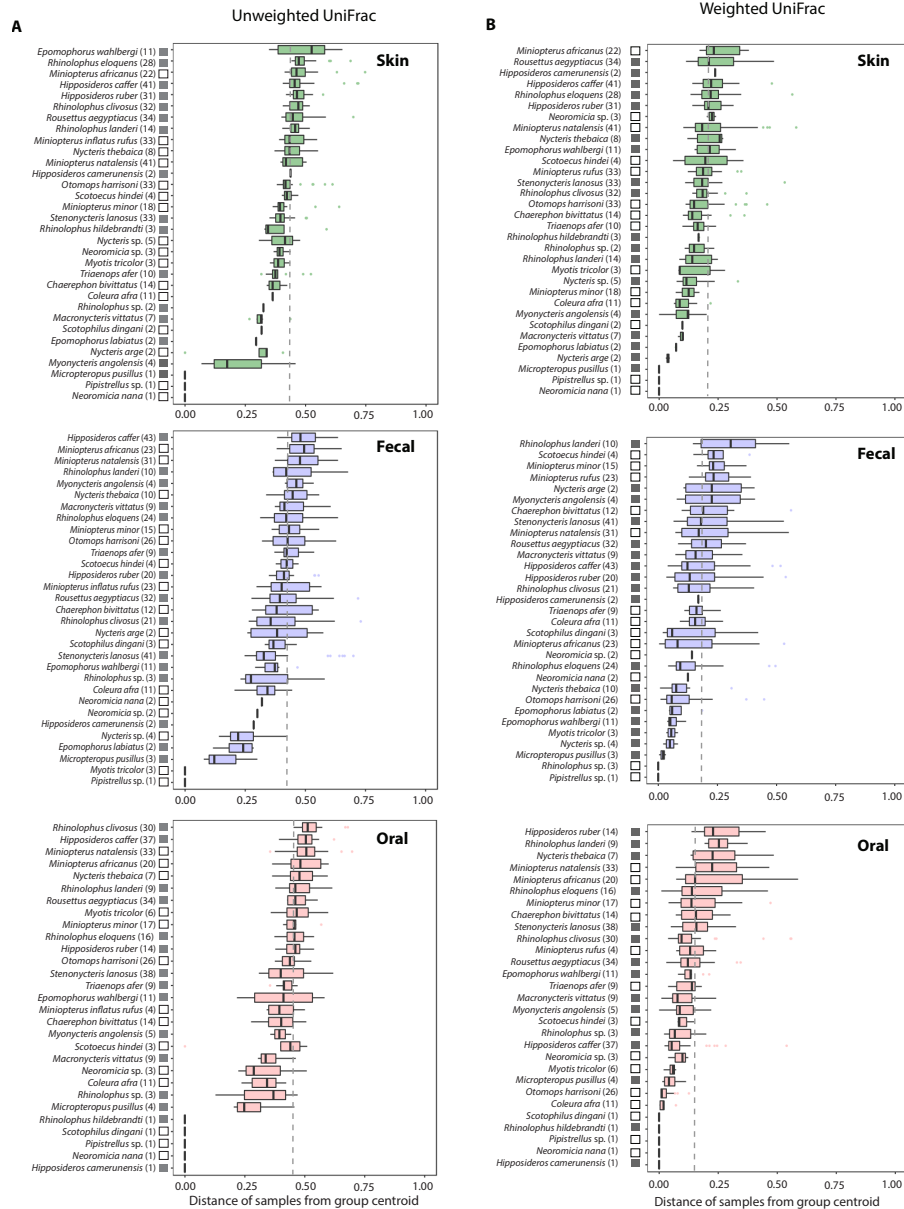

**Figure S2 CONTINUED.** Intraspecific variation across anatomical sites measured as beta dispersion of (A) unweighted UniFrac, (B) weighted UniFrac, and (C) Bray-Curtis distances. Dotted lines indicate mean dispersion for anatomical groupings; numbers in parentheses indicate sample size per bat species. White and gray boxes correspond to the chiropteran suborders Yangochiroptera (microbats) and Yinpterochiroptera (fruits bats and kin), respectively.

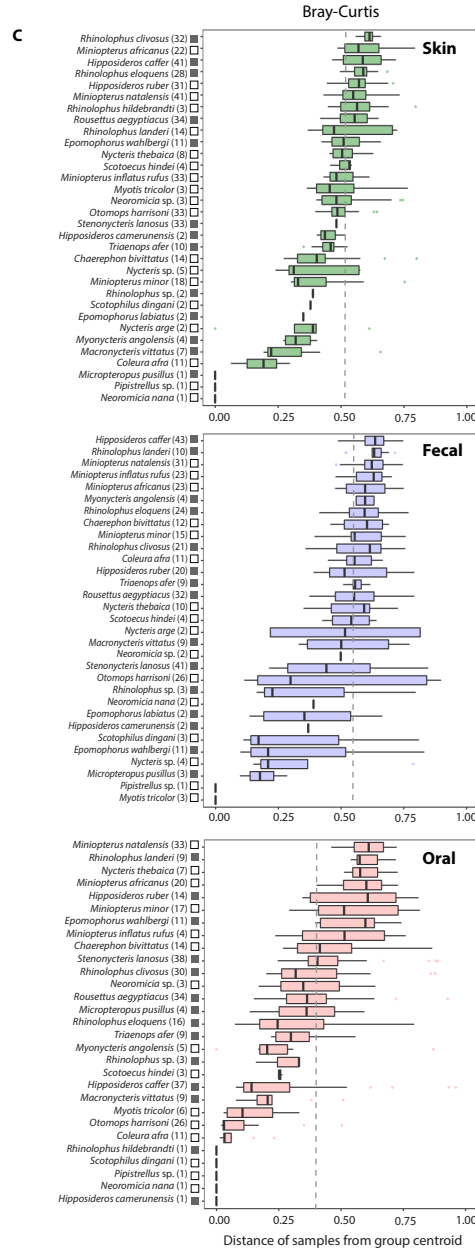

**Figure S3.** Linear regression of (A) Shannon diversity and (B) observed ASV richness of gut, oral, and skin microbiomes against elevation from which host was sampled (~0 - 2500 meters above sea-level).  $R^2$  and significance values are provided within each plot.

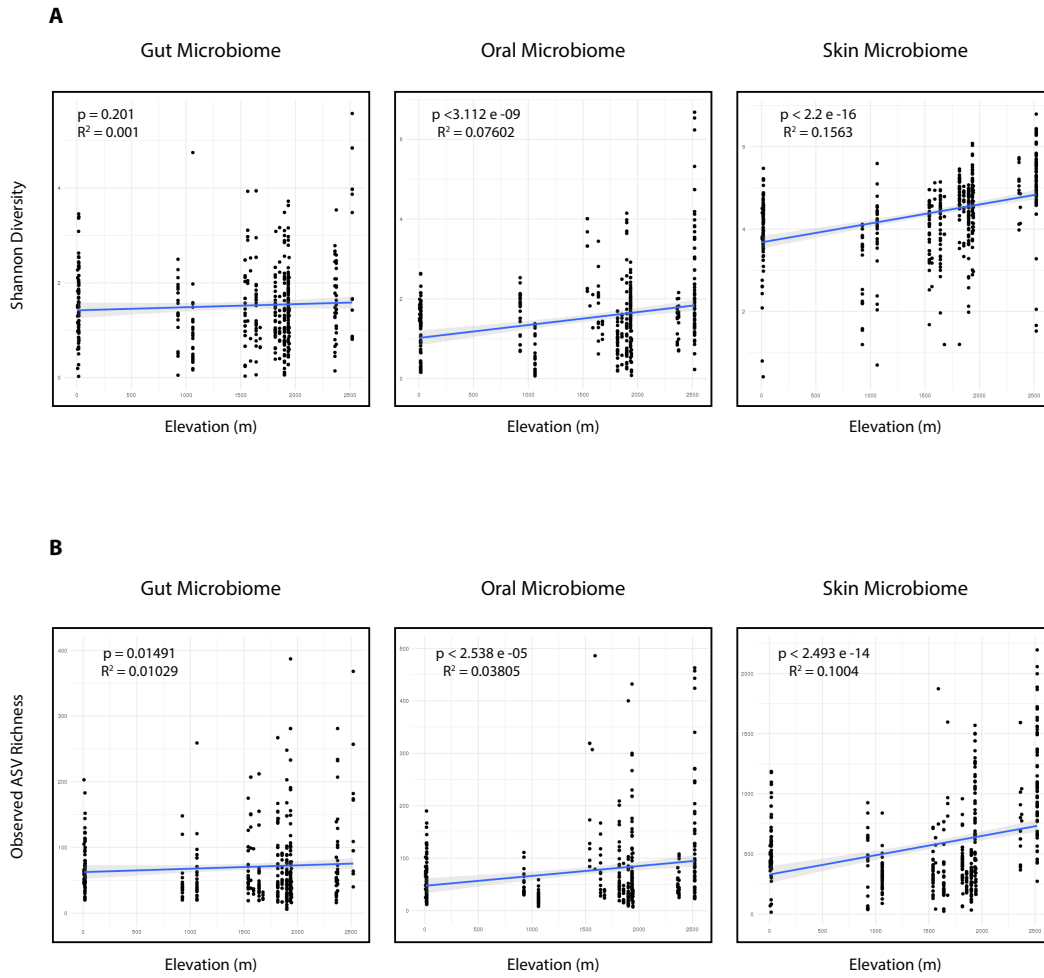

**Figure S4.** Network Analyses. A) Node degree distribution of parasitized and non-parasitized bats, grouped by family. B) Network fragility plots, showing natural network connectivity with sequential removal of nodes ordered by betweenness and degree.

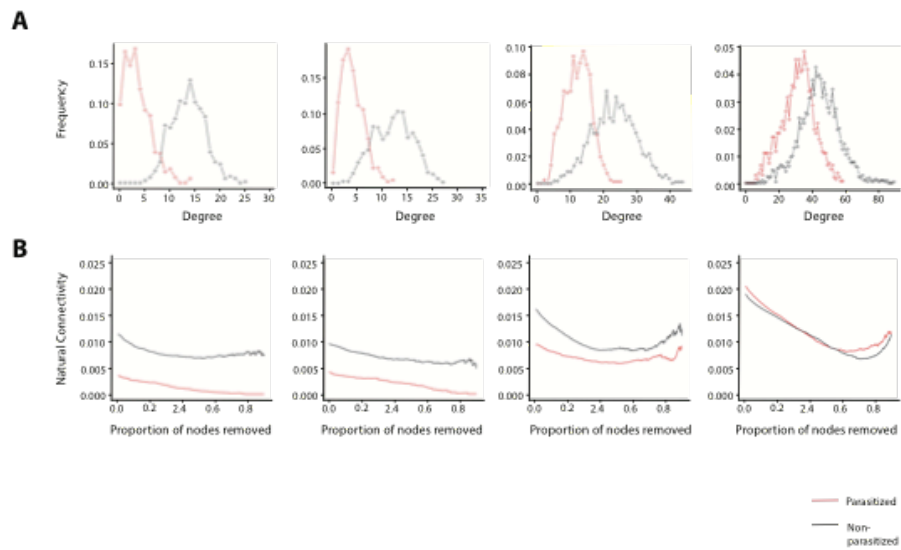

**Figure S5.** Maximum likelihood phylogeny of bat species based on the mitochondrial Cytochrome *b* locus (Cyt *b*). Phylogenetic distances were calculated as patristic distances based on maximum likelihood reconstruction of bat species-level phylogeny with 1000 bootstrap (bs) replicates. Closed black circles > 97% bs support, open circles > 70% bs support. Voucher specimens are accessioned at the Field Museum of Natural History (Chicago, IL); accession information can be found in Table S3 (where specimens included in phylogenetic analyses are highlighted in red).

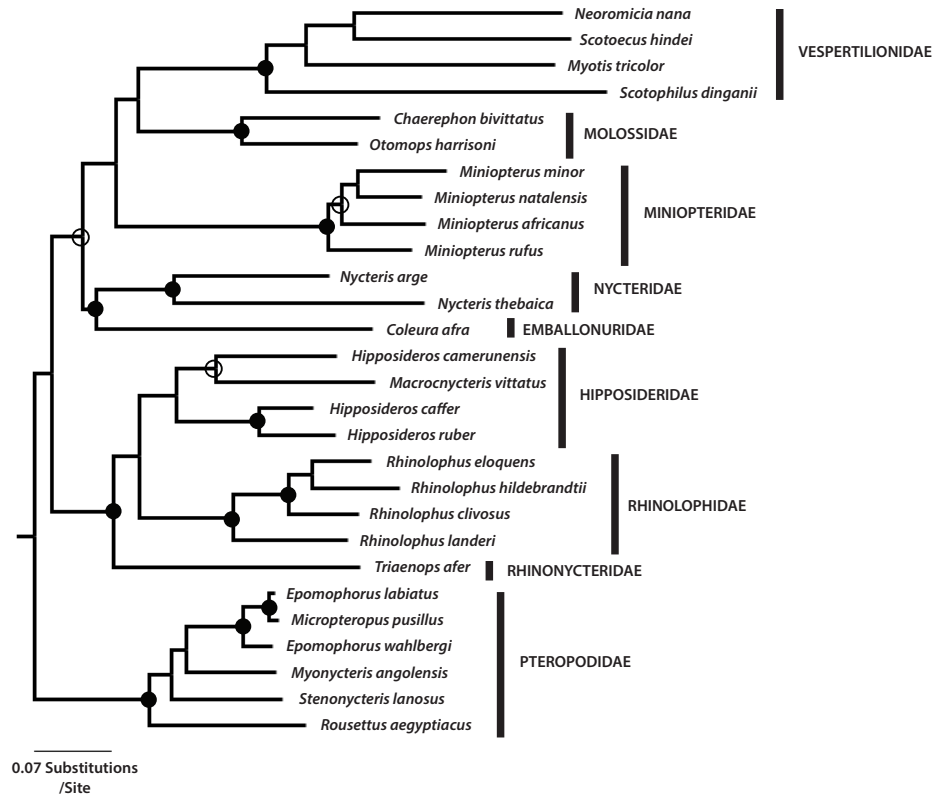

Source: https://www.biorxiv.org/content/10.1101/340109v4.full.pdf
